# Supplementary material for: A water-soluble carbon nanotube network conjugated by nanoparticles with defined nanometre gaps
Source: Royal Society of Chemistry journal article supplement (doi:10.1039/c0cc05503d), 2011-01-01
Supplement: c0cc05503d.pdf [file c0cc05503d.pdf]

## Supplementary Information

### A water-soluble carbon nanotube network conjugated by nanoparticles with defined nanometer gaps

Mime Kobayashi,<sup>‡</sup> Shinya Kumagai, Bin Zheng, Yukiharu Uraoka, Trevor Douglas  
and Ichiro Yamashita

*Graduate School of Materials Science, Nara Institute of Science and Technology*

<sup>‡</sup>Present address: *Japanese Foundation for Cancer Research*

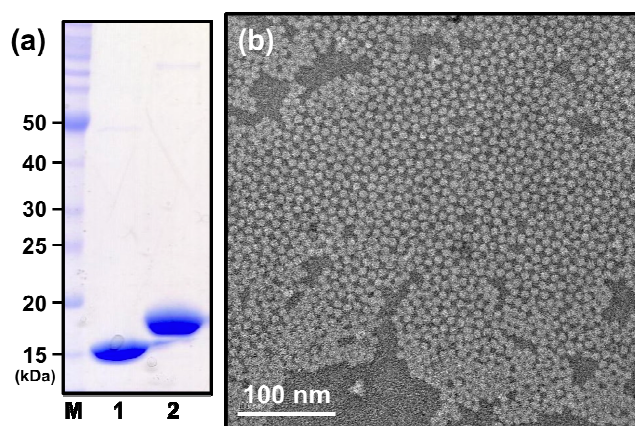

**Fig. S1** Expression and purification of NHBP-LiDps protein. (a) Protein purity was confirmed by sodium dodecyl sulfate polyacrylamide gel electrophoresis (SDS-PAGE) using a 12.5% gel (READY GELS J, Bio-Rad) followed by Coomassie Brilliant Blue staining. Lane M; size marker, lane 1; LiDps, lane 2; NHBP-LiDps. (b) A TEM image of NHBP-LiDps protein expressed in *E. coli* after purification. White circles of about 9 nm diameters are LiDps proteins, which were stained with 3% phosphotungstic acid (PTA). The proteins were apparently rhombohedrally aligned (upper region of the TEM image) although conventional hexagonal packaging was also observed (bottom region of the TEM image).

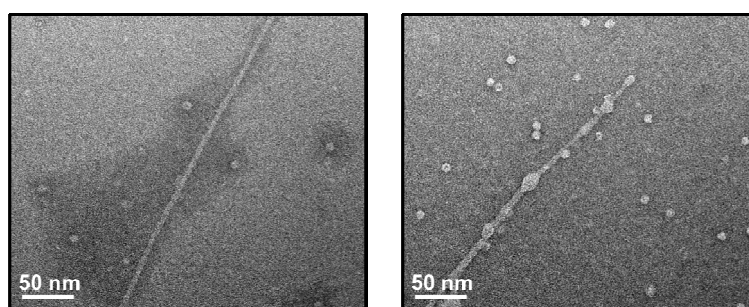

**Fig. S2** Without the peptide displayed outside of LiDps proteins, cage-shaped proteins were observed to be indifferent to SWNTs. Two representative PTA-stained TEM images from a single sample preparation of LiDps protein mixed with single-walled carbon nanotubes (SWNTs) are shown for better assessment of the effect of NHBP-1 peptide.

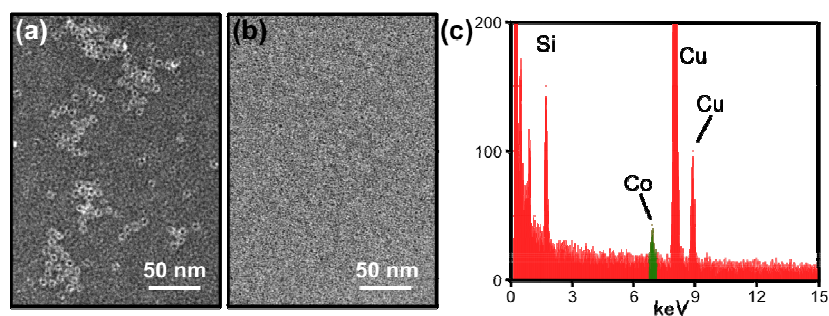

**Fig. S3** Co nanoparticles are formed inside NHBP-LiDps proteins. TEM images of the protein with Co oxide core stained with (a) 3% PTA and (b) 1% aurothioglucose, which does not stain the central cavity of the cage-shaped protein. (c) EDS spectra of non-stained sample. Cu and Si signals were derived from a TEM grid.

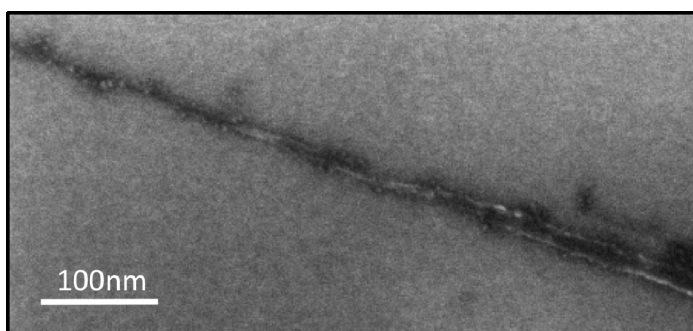

**Fig. S4** A high-resolution scanning electron microscopy (SEM) image of Co oxide nanoparticles aligned along SWNTs. To obtain the maximum resolution, SWNT-protein complex in pure H<sub>2</sub>O was put onto a surface-cleaned silicon oxide substrate. Protein shell is not visible in SEM image.

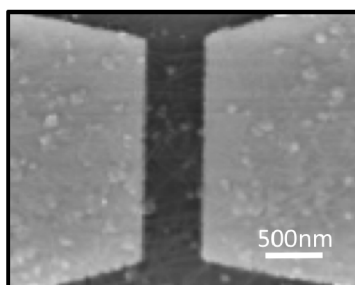

**Fig. S5** An SEM image of the SWNT/NHBP-LiDps(Co) structures covering a pair of Au electrodes fabricated on a silicon surface. Co oxide nanoparticles were not visible because their size was under the limit of resolution when they are bridging 25 nm-high electrodes, and not on a flat surface (Fig. S4).
